# Supplementary material
Source: PubMed Central journal article supplement (PMC1828753)
Supplement: msb4100126-s5.pdf [file msb4100126-s5.pdf]

## Supplementary Table 2. Differential equations and constraints

### differential equations

$$d[\text{CyclinD}]/dt = -k_d\_{\text{CyclinD}} * [\text{CyclinD}] + k_s\_{\text{CyclinD}} - k_b\_{\text{CyclinD}}\_{\text{Cdk4}} * [\text{Cdk4}[00]] * [\text{CyclinD}] - k_b\_{\text{CyclinD}}\_{\text{Cdk4}} * [\text{Cdk4}[10]] * [\text{CyclinD}] + k_u\_{\text{CyclinD}}\_{\text{Cdk4}} * [\text{Cdk4}[01]] + k_u\_{\text{CyclinD}}\_{\text{Cdk4}} * [\text{Cdk4}[11]]$$

$$d[\text{Cdk4}[00]]/dt = -k_b\_{p27}\_{\text{Cdk4}} * [\text{Cdk4}[00]] * [p27] + k_u\_{p27}\_{\text{Cdk4}} * [\text{Cdk4}[10]] - k_b\_{\text{CyclinD}}\_{\text{Cdk4}} * [\text{Cdk4}[00]] * [\text{CyclinD}] + k_u\_{\text{CyclinD}}\_{\text{Cdk4}} * [\text{Cdk4}[01]] + k_d\_{\text{CyclinD}} * [\text{Cdk4}[01]] + k_d\_{p27} * [\text{Cdk4}[10]]$$

$$d[\text{Cdk4}[10]]/dt = k_b\_{p27}\_{\text{Cdk4}} * [\text{Cdk4}[00]] * [p27] - k_u\_{p27}\_{\text{Cdk4}} * [\text{Cdk4}[10]] - k_b\_{\text{CyclinD}}\_{\text{Cdk4}} * [\text{Cdk4}[10]] * [\text{CyclinD}] + k_u\_{\text{CyclinD}}\_{\text{Cdk4}} * [\text{Cdk4}[11]] + k_d\_{\text{CyclinD}} * [\text{Cdk4}[11]] - k_d\_{p27} * [\text{Cdk4}[10]]$$

$$d[\text{Cdk4}[01]]/dt = -k_b\_{p27}\_{\text{Cdk4}} * [\text{Cdk4}[01]] * [p27] + k_u\_{p27}\_{\text{Cdk4}} * [\text{Cdk4}[11]] + k_b\_{\text{CyclinD}}\_{\text{Cdk4}} * [\text{Cdk4}[00]] * [\text{CyclinD}] - k_u\_{\text{CyclinD}}\_{\text{Cdk4}} * [\text{Cdk4}[01]] - k_d\_{\text{CyclinD}} * [\text{Cdk4}[01]] + k_d\_{p27} * [\text{Cdk4}[11]] - k_b\_{D4}\_{pRb} * [pRb[00]] * [\text{Cdk4}[01]] + k_u\_{D4}\_{pRb} * [\text{Cdk4}[01]\_{pRb[00]}\_{pRb[10]}\_{\text{Int}}] + k_{up}\_{D4}\_{pRb} * [\text{Cdk4}[01]\_{pRb[00]}\_{pRb[10]}\_{\text{Int}}] - k_b\_{D4}\_{pRb} * [pRb[01]] * [\text{Cdk4}[01]] + k_u\_{D4}\_{pRb} * [\text{Cdk4}[01]\_{pRb[01]}\_{pRb[11]}\_{\text{Int}}] + k_{up}\_{D4}\_{pRb} * [\text{Cdk4}[01]\_{pRb[01]}\_{pRb[11]}\_{\text{Int}}]$$

$$d[\text{Cdk4}[11]]/dt = k_b\_{p27}\_{\text{Cdk4}} * [\text{Cdk4}[01]] * [p27] - k_u\_{p27}\_{\text{Cdk4}} * [\text{Cdk4}[11]] + k_b\_{\text{CyclinD}}\_{\text{Cdk4}} * [\text{Cdk4}[10]] * [\text{CyclinD}] - k_u\_{\text{CyclinD}}\_{\text{Cdk4}} * [\text{Cdk4}[11]] - k_d\_{\text{CyclinD}} * [\text{Cdk4}[11]] - k_d\_{p27} * [\text{Cdk4}[11]]$$

$$d[p27]/dt = k_s\_{p27} - k_d\_{p27} * [p27] - k_b\_{p27}\_{\text{Cdk4}} * [\text{Cdk4}[00]] * [p27] - k_b\_{p27}\_{\text{Cdk4}} * [\text{Cdk4}[01]] * [p27] + k_u\_{p27}\_{\text{Cdk4}} * [\text{Cdk4}[10]] + k_u\_{p27}\_{\text{Cdk4}} * [\text{Cdk4}[11]] - k_b\_{p27}\_{\text{Cdk2}} * [\text{Cdk2}[000]] * [p27] - k_b\_{p27}\_{\text{Cdk2}} * [\text{Cdk2}[010]] * [p27] - k_b\_{p27}\_{\text{Cdk2}} * [\text{Cdk2}[001]] * [p27] - k_b\_{p27}\_{\text{Cdk2}} * [\text{Cdk2}[011]] * [p27] - k_b\_{p27}\_{\text{Cdk2}} * [\text{Cdk2}[002]] * [p27] - k_b\_{p27}\_{\text{Cdk2}} * [\text{Cdk2}[012]] * [p27] + k_u\_{p27}\_{\text{Cdk2}} * [\text{Cdk2}[100]] + k_u\_{p27}\_{\text{Cdk2}} * [\text{Cdk2}[110]] + k_u\_{p27}\_{\text{Cdk2}} * [\text{Cdk2}[101]] + k_u\_{p27}\_{\text{Cdk2}} * [\text{Cdk2}[111]] + k_u\_{p27}\_{\text{Cdk2}} * [\text{Cdk2}[102]] + k_u\_{p27}\_{\text{Cdk2}} * [\text{Cdk2}[112]]$$

$$d[\text{CyclinA}]/dt = k_s\_{\text{CyclinA}} - k_d\_{\text{CyclinA}} * [\text{CyclinA}] - k_b\_{\text{APCC}}\_{\text{CyclinA}} * [\text{CyclinA}] * [\text{APC/C}] + k_u\_{\text{APCC}}\_{\text{CyclinA}} * [\text{APC/C}\_{\text{CyclinA}}\_{\text{Int}}] - k_b\_{\text{CyclinA}}\_{\text{Cdk1}} * [\text{Cdk1}[00]] * [\text{CyclinA}] - k_b\_{\text{CyclinA}}\_{\text{Cdk1}} * [\text{Cdk1}[10]] * [\text{CyclinA}] - k_b\_{\text{CyclinA}}\_{\text{Cdk2}} * [\text{Cdk2}[000]] * [\text{CyclinA}] - k_b\_{\text{CyclinA}}\_{\text{Cdk2}} * [\text{Cdk2}[100]] * [\text{CyclinA}] - k_b\_{\text{CyclinA}}\_{\text{Cdk2}} * [\text{Cdk2}[010]] * [\text{CyclinA}] - k_b\_{\text{CyclinA}}\_{\text{Cdk2}} * [\text{Cdk2}[110]] * [\text{CyclinA}] + k_u\_{\text{CyclinA}}\_{\text{Cdk2}} * [\text{Cdk2}[002]] + k_u\_{\text{CyclinA}}\_{\text{Cdk2}} * [\text{Cdk2}[102]] + k_u\_{\text{CyclinA}}\_{\text{Cdk2}} * [\text{Cdk2}[012]] + k_u\_{\text{CyclinA}}\_{\text{Cdk2}} * [\text{Cdk2}[112]] + k_u\_{\text{CyclinA}}\_{\text{Cdk1}} * [\text{Cdk1}[01]] + k_u\_{\text{CyclinA}}\_{\text{Cdk1}} * [\text{Cdk1}[11]]$$

$$d[\text{CyclinE}]/dt = k_s\_{\text{CyclinE}} - k_d\_{\text{CyclinE}} * [\text{CyclinE}] - k_b\_{\text{CyclinE}}\_{\text{Cdk2}} * [\text{Cdk2}[000]] * [\text{CyclinE}] - k_b\_{\text{CyclinE}}\_{\text{Cdk2}} * [\text{Cdk2}[100]] * [\text{CyclinE}] - k_b\_{\text{CyclinE}}\_{\text{Cdk2}} * [\text{Cdk2}[010]] * [\text{CyclinE}] - k_b\_{\text{CyclinE}}\_{\text{Cdk2}} * [\text{Cdk2}[110]] * [\text{CyclinE}] + k_u\_{\text{CyclinE}}\_{\text{Cdk2}} * [\text{Cdk2}[001]] +$$

$$\text{ku\_CyclinE\_Cdk2} * [\text{Cdk2}[101]] + \text{ku\_CyclinE\_Cdk2} * [\text{Cdk2}[011]] + \text{ku\_CyclinE\_Cdk2} * [\text{Cdk2}[111]]$$

$$\begin{aligned} d[\text{Cdk2}[000]]/dt = & -\text{kb\_p27\_Cdk2} * [\text{Cdk2}[000]] * [\text{p27}] + \text{ku\_p27\_Cdk2} * \\ & [\text{Cdk2}[100]] - \text{kb\_CyclinE\_Cdk2} * [\text{Cdk2}[000]] * [\text{CyclinE}] + \\ & \text{ku\_CyclinE\_Cdk2} * [\text{Cdk2}[001]] - \text{kb\_CyclinA\_Cdk2} * [\text{Cdk2}[000]] * \\ & [\text{CyclinA}] + \text{ku\_CyclinA\_Cdk2} * [\text{Cdk2}[002]] - \text{k\_act} * [\text{Cdk2}[000]] + \\ & \text{kd\_p27} * [\text{Cdk2}[100]] + \text{kd\_CyclinE} * [\text{Cdk2}[001]] + \text{kd\_CyclinA} * \\ & [\text{Cdk2}[002]] + \text{kud\_APCC\_CyclinA} * [\text{APC/C\_Cdk2}[000]\_Cdk2[002]\_Int] \end{aligned}$$

$$\begin{aligned} d[\text{Cdk2}[100]]/dt = & \text{kb\_p27\_Cdk2} * [\text{Cdk2}[000]] * [\text{p27}] - \text{ku\_p27\_Cdk2} * \\ & [\text{Cdk2}[100]] - \text{kb\_CyclinE\_Cdk2} * [\text{Cdk2}[100]] * [\text{CyclinE}] + \\ & \text{ku\_CyclinE\_Cdk2} * [\text{Cdk2}[101]] - \text{kb\_CyclinA\_Cdk2} * [\text{Cdk2}[100]] * \\ & [\text{CyclinA}] + \text{ku\_CyclinA\_Cdk2} * [\text{Cdk2}[102]] - \text{k\_act} * [\text{Cdk2}[100]] - \\ & \text{kd\_p27} * [\text{Cdk2}[100]] + \text{kd\_CyclinE} * [\text{Cdk2}[101]] + \text{kd\_CyclinA} * \\ & [\text{Cdk2}[102]] + \text{kud\_APCC\_CyclinA} * [\text{APC/C\_Cdk2}[100]\_Cdk2[102]\_Int] \end{aligned}$$

$$\begin{aligned} d[\text{Cdk2}[010]]/dt = & -\text{kb\_p27\_Cdk2} * [\text{Cdk2}[010]] * [\text{p27}] + \text{ku\_p27\_Cdk2} * \\ & [\text{Cdk2}[110]] - \text{kb\_CyclinE\_Cdk2} * [\text{Cdk2}[010]] * [\text{CyclinE}] + \\ & \text{ku\_CyclinE\_Cdk2} * [\text{Cdk2}[011]] - \text{kb\_CyclinA\_Cdk2} * [\text{Cdk2}[010]] * \\ & [\text{CyclinA}] + \text{ku\_CyclinA\_Cdk2} * [\text{Cdk2}[012]] + \text{k\_act} * [\text{Cdk2}[000]] + \\ & \text{kd\_p27} * [\text{Cdk2}[110]] + \text{kd\_CyclinE} * [\text{Cdk2}[011]] + \text{kd\_CyclinA} * \\ & [\text{Cdk2}[012]] + \text{kud\_APCC\_CyclinA} * [\text{APC/C\_Cdk2}[010]\_Cdk2[012]\_Int] \end{aligned}$$

$$\begin{aligned} d[\text{Cdk2}[110]]/dt = & \text{kb\_p27\_Cdk2} * [\text{Cdk2}[010]] * [\text{p27}] - \text{ku\_p27\_Cdk2} * \\ & [\text{Cdk2}[110]] - \text{kb\_CyclinE\_Cdk2} * [\text{Cdk2}[110]] * [\text{CyclinE}] + \\ & \text{ku\_CyclinE\_Cdk2} * [\text{Cdk2}[111]] - \text{kb\_CyclinA\_Cdk2} * [\text{Cdk2}[110]] * \\ & [\text{CyclinA}] + \text{ku\_CyclinA\_Cdk2} * [\text{Cdk2}[112]] + \text{k\_act} * [\text{Cdk2}[100]] - \\ & \text{kd\_p27} * [\text{Cdk2}[110]] + \text{kd\_CyclinE} * [\text{Cdk2}[111]] + \text{kd\_CyclinA} * \\ & [\text{Cdk2}[112]] + \text{kud\_APCC\_CyclinA} * [\text{APC/C\_Cdk2}[110]\_Cdk2[112]\_Int] \end{aligned}$$

$$\begin{aligned} d[\text{Cdk2}[001]]/dt = & -\text{kb\_p27\_Cdk2} * [\text{Cdk2}[001]] * [\text{p27}] + \text{ku\_p27\_Cdk2} * \\ & [\text{Cdk2}[101]] + \text{kb\_CyclinE\_Cdk2} * [\text{Cdk2}[000]] * [\text{CyclinE}] - \\ & \text{ku\_CyclinE\_Cdk2} * [\text{Cdk2}[001]] - \text{k\_act} * [\text{Cdk2}[001]] + \text{kd\_p27} * \\ & [\text{Cdk2}[101]] - \text{kd\_CyclinE} * [\text{Cdk2}[001]] \end{aligned}$$

$$\begin{aligned} d[\text{Cdk2}[101]]/dt = & \text{kb\_p27\_Cdk2} * [\text{Cdk2}[001]] * [\text{p27}] - \text{ku\_p27\_Cdk2} * \\ & [\text{Cdk2}[101]] + \text{kb\_CyclinE\_Cdk2} * [\text{Cdk2}[100]] * [\text{CyclinE}] - \\ & \text{ku\_CyclinE\_Cdk2} * [\text{Cdk2}[101]] - \text{k\_act} * [\text{Cdk2}[101]] - \text{kd\_p27} * \\ & [\text{Cdk2}[101]] - \text{kd\_CyclinE} * [\text{Cdk2}[101]] \end{aligned}$$

$$\begin{aligned} d[\text{Cdk2}[011]]/dt = & -\text{kb\_p27\_Cdk2} * [\text{Cdk2}[011]] * [\text{p27}] + \text{ku\_p27\_Cdk2} * \\ & [\text{Cdk2}[111]] + \text{kb\_CyclinE\_Cdk2} * [\text{Cdk2}[010]] * [\text{CyclinE}] - \\ & \text{ku\_CyclinE\_Cdk2} * [\text{Cdk2}[011]] + \text{k\_act} * [\text{Cdk2}[001]] + \text{kd1\_p27} * \\ & [\text{Cdk2}[111]] - \text{kd\_CyclinE} * [\text{Cdk2}[011]] - \text{kb\_E2\_pRb} * [\text{pRb}[10]] * \\ & [\text{Cdk2}[011]] + \text{ku\_E2\_pRb} * [\text{Cdk2}[011]\_pRb[10]\_pRb[20]\_Int] + \\ & \text{kup\_E2\_pRb} * [\text{Cdk2}[011]\_pRb[10]\_pRb[20]\_Int] - \text{kb\_E2\_pRb} * [\text{pRb}[11]] \\ & * [\text{Cdk2}[011]] + \text{ku\_E2\_pRb} * [\text{Cdk2}[011]\_pRb[11]\_pRb[21]\_Int] + \\ & \text{kup\_E2\_pRb} * [\text{Cdk2}[011]\_pRb[11]\_pRb[21]\_Int] \end{aligned}$$

$$\begin{aligned} d[\text{Cdk2}[111]]/dt = & \text{kb\_p27\_Cdk2} * [\text{Cdk2}[011]] * [\text{p27}] - \text{ku\_p27\_Cdk2} * \\ & [\text{Cdk2}[111]] + \text{kb\_CyclinE\_Cdk2} * [\text{Cdk2}[110]] * [\text{CyclinE}] - \\ & \text{ku\_CyclinE\_Cdk2} * [\text{Cdk2}[111]] + \text{k\_act} * [\text{Cdk2}[101]] - \text{kd1\_p27} * \\ & [\text{Cdk2}[111]] - \text{kd\_CyclinE} * [\text{Cdk2}[111]] \end{aligned}$$

$$\begin{aligned} d[\text{Cdk2}[002]]/dt = & -\text{kb\_p27\_Cdk2} * [\text{Cdk2}[002]] * [\text{p27}] + \text{ku\_p27\_Cdk2} * \\ & [\text{Cdk2}[102]] + \text{kb\_CyclinA\_Cdk2} * [\text{Cdk2}[000]] * [\text{CyclinA}] - \end{aligned}$$

$ku\_CyclinA\_Cdk2 * [Cdk2[002]] - k\_act * [Cdk2[002]] + kd\_p27 * [Cdk2[102]] - kd\_CyclinA * [Cdk2[002]] - kb\_APCC\_CyclinA * [Cdk2[002]] * [APC/C] + ku\_APCC\_CyclinA * [APC/C\_Cdk2[000]\_Cdk2[002]\_Int]$

$d[Cdk2[102]]/dt = kb\_p27\_Cdk2 * [Cdk2[002]] * [p27] - ku\_p27\_Cdk2 * [Cdk2[102]] + kb\_CyclinA\_Cdk2 * [Cdk2[100]] * [CyclinA] - ku\_CyclinA\_Cdk2 * [Cdk2[102]] - k\_act * [Cdk2[102]] - kd\_p27 * [Cdk2[102]] - kd\_CyclinA * [Cdk2[102]] - kb\_APCC\_CyclinA * [Cdk2[102]] * [APC/C] + ku\_APCC\_CyclinA * [APC/C\_Cdk2[100]\_Cdk2[102]\_Int]$

$d[Cdk2[012]]/dt = -kb\_p27\_Cdk2 * [Cdk2[012]] * [p27] + ku\_p27\_Cdk2 * [Cdk2[112]] + kb\_CyclinA\_Cdk2 * [Cdk2[010]] * [CyclinA] - ku\_CyclinA\_Cdk2 * [Cdk2[012]] + k\_act * [Cdk2[002]] + kd\_p27 * [Cdk2[112]] - kd\_CyclinA * [Cdk2[012]] - kb\_APCC\_CyclinA * [Cdk2[012]] * [APC/C] + ku\_APCC\_CyclinA * [APC/C\_Cdk2[010]\_Cdk2[012]\_Int] - kb\_A2\_pRb * [pRb[10]] * [Cdk2[012]] + ku\_A2\_pRb * [Cdk2[012]\_pRb[10]\_pRb[20]\_Int] + kup\_A2\_pRb * [Cdk2[012]\_pRb[10]\_pRb[20]\_Int] - kb\_A2\_pRb * [pRb[11]] * [Cdk2[012]] + ku\_A2\_pRb * [Cdk2[012]\_pRb[11]\_pRb[21]\_Int] + kup\_A2\_pRb * [Cdk2[012]\_pRb[11]\_pRb[21]\_Int]$

$d[Cdk2[112]]/dt = kb\_p27\_Cdk2 * [Cdk2[012]] * [p27] - ku\_p27\_Cdk2 * [Cdk2[112]] + kb\_CyclinA\_Cdk2 * [Cdk2[110]] * [CyclinA] - ku\_CyclinA\_Cdk2 * [Cdk2[112]] + k\_act * [Cdk2[102]] - kd\_p27 * [Cdk2[112]] - kd\_CyclinA * [Cdk2[112]] - kb\_APCC\_CyclinA * [Cdk2[112]] * [APC/C] + ku\_APCC\_CyclinA * [APC/C\_Cdk2[110]\_Cdk2[112]\_Int]$

$d[Cdk1[00]]/dt = -kb\_CyclinA\_Cdk1 * [Cdk1[00]] * [CyclinA] + ku\_CyclinA\_Cdk1 * [Cdk1[01]] - k\_act * [Cdk1[00]] + kd\_CyclinA * [Cdk1[01]] + kud\_APCC\_CyclinA * [APC/C\_Cdk1[00]\_Cdk1[01]\_Int]$

$d[Cdk1[10]]/dt = -kb\_CyclinA\_Cdk1 * [Cdk1[10]] * [CyclinA] + ku\_CyclinA\_Cdk1 * [Cdk1[11]] + k\_act * [Cdk1[00]] + kd\_CyclinA * [Cdk1[11]] + kud\_APCC\_CyclinA * [APC/C\_Cdk1[10]\_Cdk1[11]\_Int]$

$d[Cdk1[01]]/dt = kb\_CyclinA\_Cdk1 * [Cdk1[00]] * [CyclinA] - ku\_CyclinA\_Cdk1 * [Cdk1[01]] - k\_act * [Cdk1[01]] - kd\_CyclinA * [Cdk1[01]] - kb\_APCC\_CyclinA * [Cdk1[01]] * [APC/C] + ku\_APCC\_CyclinA * [APC/C\_Cdk1[00]\_Cdk1[01]\_Int]$

$d[Cdk1[11]]/dt = kb\_CyclinA\_Cdk1 * [Cdk1[10]] * [CyclinA] - ku\_CyclinA\_Cdk1 * [Cdk1[11]] + k\_act * [Cdk1[01]] - kd\_CyclinA * [Cdk1[11]] - kb\_APCC\_CyclinA * [Cdk1[11]] * [APC/C] + ku\_APCC\_CyclinA * [APC/C\_Cdk1[10]\_Cdk1[11]\_Int] - kb\_A1\_pRb * [pRb[10]] * [Cdk1[11]] + ku\_A1\_pRb * [Cdk1[11]\_pRb[10]\_pRb[20]\_Int] + kup\_A1\_pRb * [Cdk1[11]\_pRb[10]\_pRb[20]\_Int] - kb\_A1\_pRb * [pRb[11]] * [Cdk1[11]] + ku\_A1\_pRb * [Cdk1[11]\_pRb[11]\_pRb[21]\_Int] + kup\_A1\_pRb * [Cdk1[11]\_pRb[11]\_pRb[21]\_Int]$

$d[Cdk4[01]\_pRb[00]\_pRb[10]\_Int]/dt = kb\_D4\_pRb * [pRb[00]] * [Cdk4[01]] - ku\_D4\_pRb * [Cdk4[01]\_pRb[00]\_pRb[10]\_Int] - kup\_D4\_pRb * [Cdk4[01]\_pRb[00]\_pRb[10]\_Int]$

$d[Cdk4[01]\_pRb[01]\_pRb[11]\_Int]/dt = kb\_D4\_pRb * [pRb[01]] * [Cdk4[01]] - ku\_D4\_pRb * [Cdk4[01]\_pRb[01]\_pRb[11]\_Int] - kup\_D4\_pRb * [Cdk4[01]\_pRb[01]\_pRb[11]\_Int]$



$$d[E2F]/dt = ks\_E2F - kd0\_E2F * [E2F] - kb\_E2F\_pRb * [pRb[00]] * [E2F] - kb\_E2F\_pRb * [pRb[10]] * [E2F] + ku\_E2F\_pRb * [pRb[01]] + ku\_E2F\_pRb * [pRb[11]] + ku\_E2F\_pRb * [pRb[21]]$$

$$d[Emi1]/dt = -kb\_Emi\_APCC * [APC/C] * [Emi1] + ku\_Emi\_APCC * [APC/C:Emi1] - kd\_Emi1 * [Emi1] + ks\_Emi1$$

$$d[APC/C]/dt = -kb\_Emi\_APCC * [APC/C] * [Emi1] + ku\_Emi\_APCC * [APC/C:Emi1] + kd\_Emi1 * [APC/C:Emi1] - kb\_APCC\_CyclinA * [CyclinA] * [APC/C] + ku\_APCC\_CyclinA * [APC/C\_CyclinA\_Int] + kud\_APCC\_CyclinA * [APC/C\_CyclinA\_Int] - kb\_APCC\_CyclinA * [Cdk2[002]] * [APC/C] + ku\_APCC\_CyclinA * [APC/C\_Cdk2[000]\_Cdk2[002]\_Int] + kud\_APCC\_CyclinA * [APC/C\_Cdk2[000]\_Cdk2[002]\_Int] - kb\_APCC\_CyclinA * [Cdk2[102]] * [APC/C] + ku\_APCC\_CyclinA * [APC/C\_Cdk2[100]\_Cdk2[102]\_Int] + kud\_APCC\_CyclinA * [APC/C\_Cdk2[100]\_Cdk2[102]\_Int] - kb\_APCC\_CyclinA * [Cdk2[012]] * [APC/C] + ku\_APCC\_CyclinA * [APC/C\_Cdk2[010]\_Cdk2[012]\_Int] + kud\_APCC\_CyclinA * [APC/C\_Cdk2[010]\_Cdk2[012]\_Int] - kb\_APCC\_CyclinA * [Cdk2[112]] * [APC/C] + ku\_APCC\_CyclinA * [APC/C\_Cdk2[110]\_Cdk2[112]\_Int] + kud\_APCC\_CyclinA * [APC/C\_Cdk2[110]\_Cdk2[112]\_Int] - kb\_APCC\_CyclinA * [Cdk1[01]] * [APC/C] + ku\_APCC\_CyclinA * [APC/C\_Cdk1[00]\_Cdk1[01]\_Int] + kud\_APCC\_CyclinA * [APC/C\_Cdk1[00]\_Cdk1[01]\_Int] - kb\_APCC\_CyclinA * [Cdk1[11]] * [APC/C] + ku\_APCC\_CyclinA * [APC/C\_Cdk1[10]\_Cdk1[11]\_Int] + kud\_APCC\_CyclinA * [APC/C\_Cdk1[10]\_Cdk1[11]\_Int]$$

$$d[APC/C:Emi1]/dt = kb\_Emi\_APCC * [APC/C] * [Emi1] - ku\_Emi\_APCC * [APC/C:Emi1] - kd\_Emi1 * [APC/C:Emi1]$$

$$d[APC/C\_CyclinA\_Int]/dt = kb\_APCC\_CyclinA * [CyclinA] * [APC/C] - ku\_APCC\_CyclinA * [APC/C\_CyclinA\_Int] - kud\_APCC\_CyclinA * [APC/C\_CyclinA\_Int]$$

$$d[APC/C\_Cdk2[000]\_Cdk2[002]\_Int]/dt = kb\_APCC\_CyclinA * [Cdk2[002]] * [APC/C] - ku\_APCC\_CyclinA * [APC/C\_Cdk2[000]\_Cdk2[002]\_Int] - kud\_APCC\_CyclinA * [APC/C\_Cdk2[000]\_Cdk2[002]\_Int]$$

$$d[APC/C\_Cdk2[100]\_Cdk2[102]\_Int]/dt = kb\_APCC\_CyclinA * [Cdk2[102]] * [APC/C] - ku\_APCC\_CyclinA * [APC/C\_Cdk2[100]\_Cdk2[102]\_Int] - kud\_APCC\_CyclinA * [APC/C\_Cdk2[100]\_Cdk2[102]\_Int]$$

$$d[APC/C\_Cdk2[010]\_Cdk2[012]\_Int]/dt = kb\_APCC\_CyclinA * [Cdk2[012]] * [APC/C] - ku\_APCC\_CyclinA * [APC/C\_Cdk2[010]\_Cdk2[012]\_Int] - kud\_APCC\_CyclinA * [APC/C\_Cdk2[010]\_Cdk2[012]\_Int]$$

$$d[APC/C\_Cdk2[110]\_Cdk2[112]\_Int]/dt = kb\_APCC\_CyclinA * [Cdk2[112]] * [APC/C] - ku\_APCC\_CyclinA * [APC/C\_Cdk2[110]\_Cdk2[112]\_Int] - kud\_APCC\_CyclinA * [APC/C\_Cdk2[110]\_Cdk2[112]\_Int]$$

$$d[APC/C\_Cdk1[00]\_Cdk1[01]\_Int]/dt = kb\_APCC\_CyclinA * [Cdk1[01]] * [APC/C] - ku\_APCC\_CyclinA * [APC/C\_Cdk1[00]\_Cdk1[01]\_Int] - kud\_APCC\_CyclinA * [APC/C\_Cdk1[00]\_Cdk1[01]\_Int]$$

$$d[APC/C\_Cdk1[10]\_Cdk1[11]\_Int]/dt = kb\_APCC\_CyclinA * [Cdk1[11]] * [APC/C] - ku\_APCC\_CyclinA * [APC/C\_Cdk1[10]\_Cdk1[11]\_Int] - kud\_APCC\_CyclinA * [APC/C\_Cdk1[10]\_Cdk1[11]\_Int]$$

## constraints

$Cdk4[00] + Cdk4[01] + Cdk4[10] + Cdk4[11] +$   
 $Cdk4[10]_{pRb[00]_{pRb[01]_{Int}} + Cdk4[01]_{pRb[10]_{pRb[11]_{Int}} = constant$

$Cdk2[000] + Cdk2[001] + Cdk2[002] + Cdk2[010] + Cdk2[011] + Cdk2[012] +$   
 $Cdk2[100] + Cdk2[101] + Cdk2[102] + Cdk2[110] + Cdk2[111] + Cdk2[112] +$   
 $Cdk2[011]_{pRb[10]_{pRb[20]_{Int}} + Cdk2[011]_{pRb[11]_{pRb[21]_{Int}} +$   
 $Cdk2[012]_{pRb[10]_{pRb[20]_{Int}} + Cdk2[012]_{pRb[11]_{pRb[21]_{Int}} =$   
constant

$Cdk1[00] + Cdk1[01] + Cdk1[10] + Cdk1[11] +$   
 $Cdk1[11]_{pRb[10]_{pRb[20]_{Int}} + Cdk1[11]_{pRb[11]_{pRb[21]_{Int}} = constant$

$pRb[00] + pRb[01] + pRb[10] + pRb[11] + pRb[20] + pRb[21] = constant$

$APC/C + APC/C:Emi1 + APC/C_{CyclinA}_{Int} + APC/C_{Cdk2[000]_{Cdk2[002]_{Int}}$   
 $+ APC/C_{Cdk2[100]_{Cdk2[102]_{Int}} + APC/C_{Cdk2[010]_{Cdk2[012]_{Int}} +$   
 $APC/C_{Cdk2[110]_{Cdk2[112]_{Int}} + APC/C_{Cdk1[00]_{Cdk1[01]_{Int}} +$   
 $APC/C_{Cdk1[10]_{Cdk1[11]_{Int}} = constant$
