# Supplementary material
Source: PubMed Central journal article supplement (PMC1828753)

Supplementary Figure 1

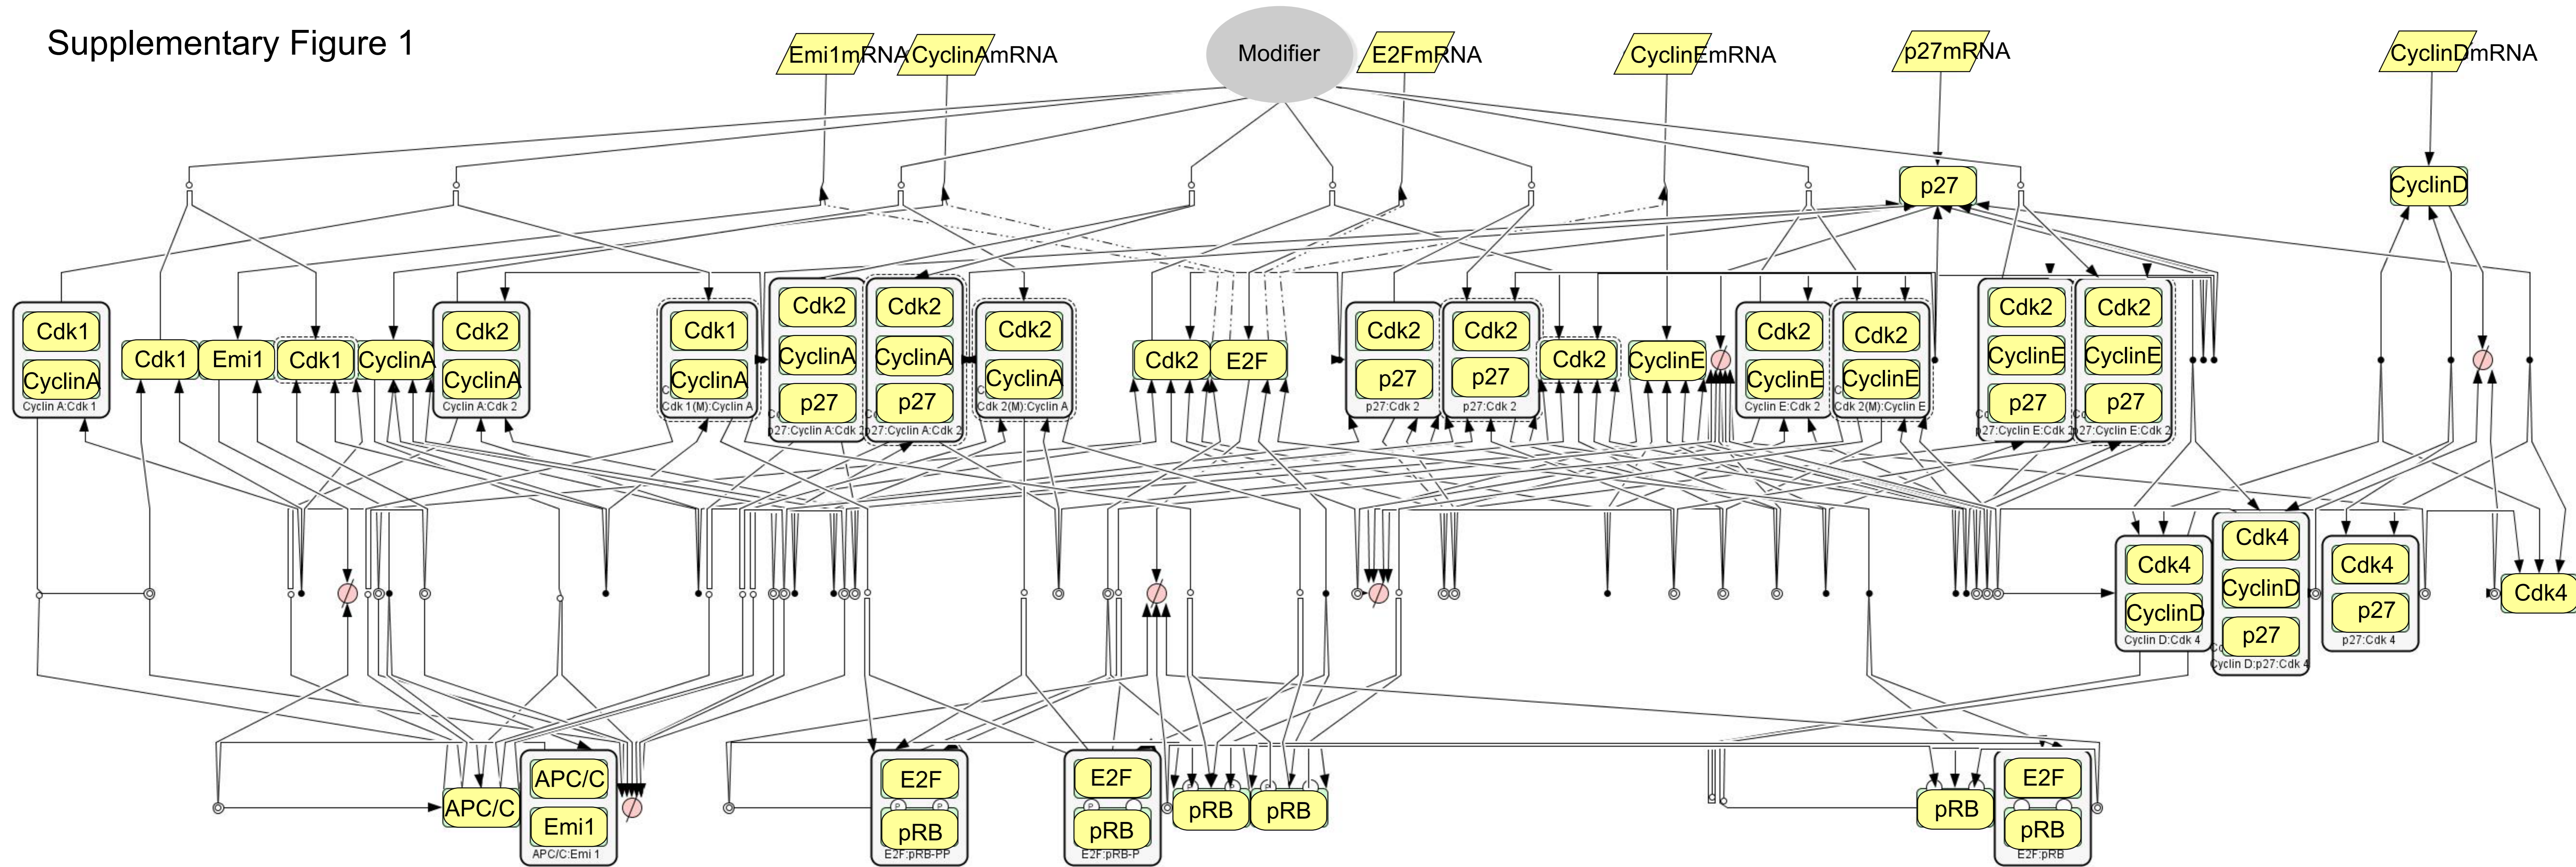

Supplement: msb4100126-s1.pdf [file msb4100126-s1.pdf]

## Supplementary Figure 2

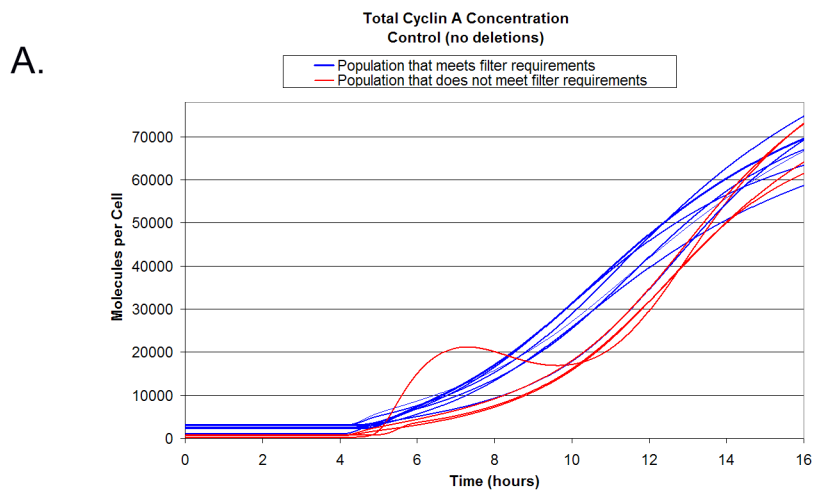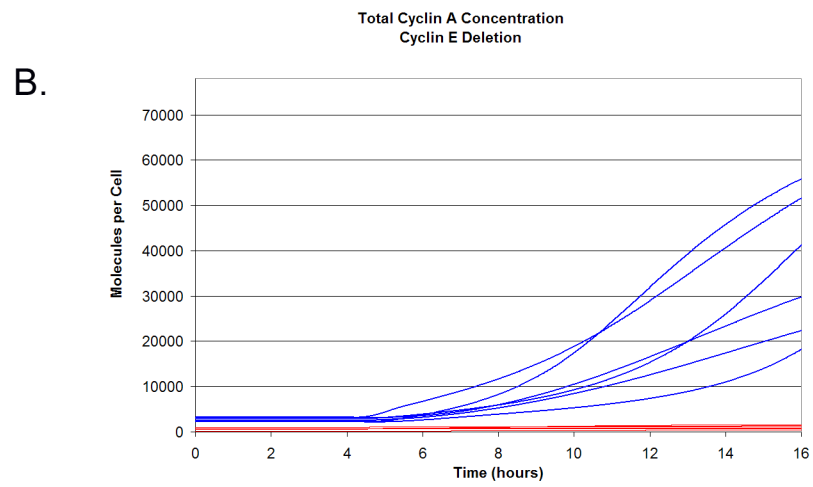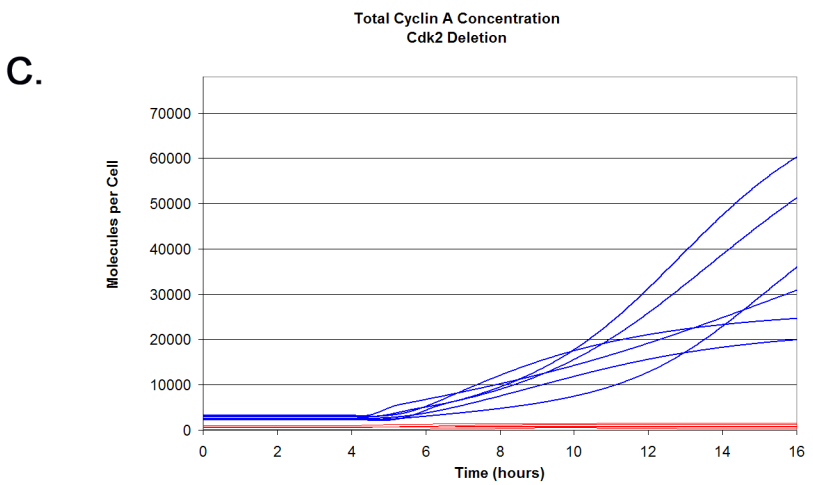

Supplement: msb4100126-s2.pdf [file msb4100126-s2.pdf]
